# Supplementary material
Source: PubMed Central journal article supplement (PMC3033229)
Supplement: NIHMS258684-supplement-1_si_001.pdf [file NIHMS258684-supplement-1_si_001.pdf]

# **Morphological changes induced by the action of antimicrobial peptides on supported lipid bilayers**

Ahmad Arouri<sup>†</sup>⊥, Volker Kiessling<sup>‡</sup>, Lukas Tamm<sup>‡</sup>, Margitta Dathe<sup>§</sup>, Alfred Blume<sup>†\*</sup>

<sup>†</sup>Martin-Luther-University Halle-Wittenberg, Institute of Chemistry, Halle, Germany.

<sup>‡</sup>University of Virginia, Department of Molecular Physiology and Biological Physics, Charlottesville, VA.

<sup>§</sup>Institute of Molecular Pharmacology, Robert-Rossle-Strasse 10, D-13125 Berlin, Germany.

⊥Current address: University of Southern Denmark, MEMPHYS-Center for Biomembrane Physics, Odense, Denmark.

## **Supporting Information**

S1: Legend for FRAP curves

S2: Movie legends

## **Figure S1.**

Fluorescence recovery after photobleaching (FRAP) experiments on supported lipid bilayers (SLB) of (A) POPG, (B) POPG/POPC, and (C) POPG/POPE. The bilayers were prepared using Langmuir Blodgett/Langmuir Schaefer (LB/LS) technique from monolayers labeled with 0.75 mol% NBD-DPPE. Experiments were performed at room temperature. The average % fluorescence recovery and lateral diffusion coefficient are as following: POPG ( $100 \pm 21\%$ ;  $0.5 \pm 0.2 \mu\text{m}^2 \text{s}^{-1}$ ), POPG/POPC ( $87 \pm 17\%$ ;  $0.8 \pm 0.3 \mu\text{m}^2 \text{s}^{-1}$ ), POPG/POPE ( $67 \pm 13\%$ ;  $0.5 \pm 0.1 \mu\text{m}^2 \text{s}^{-1}$ ).

## **Movies 1A and 1B**

Time dependent imaging of POPG SLB labelled with 0.75% NBD-DPPE after the addition of  $1\mu\text{M}$  C-RW.

## **Movie 2**

Time dependent imaging of POPG/POPC 1:1 SLB labelled with 0.75% Rh-DPPE after the addition of  $4\mu\text{M}$  C-RW.

## **Movie 3**

Time dependent imaging of POPG/POPE 1:1 SLB labelled with 0.75% Rh-DPPE after the addition of  $4\mu\text{M}$  C-RW.

## **Movie 4**

Time dependent imaging of POPG/POPC 1:1 SLB labelled with 0.75% Rh-DPPE after the addition of 4 $\mu$ M KLA1.

### **Movie 5**

Time dependent imaging of POPG/POPE 1:1 SLB labelled with 0.75% Rh-DPPE after the addition of 4 $\mu$ M KLA1.
