# Supplementary material
Source: PubMed Central journal article supplement (PMC3033229)

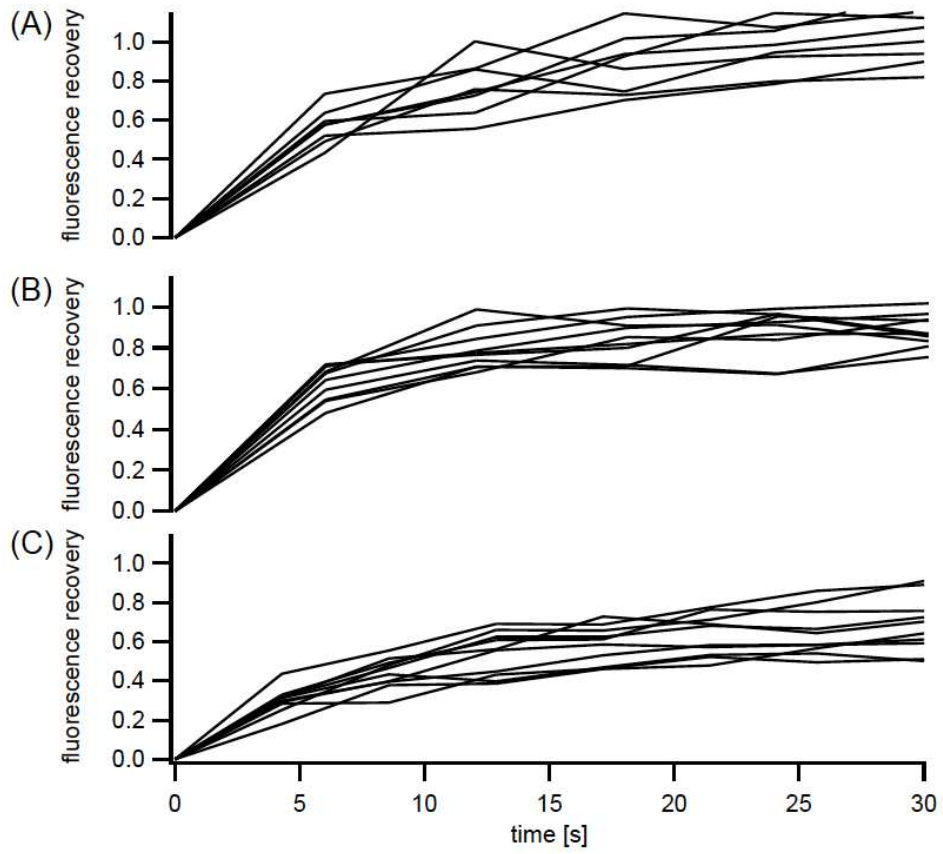

299x295mm (72 x 72 DPI)

Supplement: NIHMS258684-supplement-2_si_002.pdf [file NIHMS258684-supplement-2_si_002.pdf]
